# Supplementary figures and images for: A Clinical Decision Support System to Prevent Aggression and Reduce Restrictive Practices in a Forensic Mental Health Service
Source: Atypon-hosted journal article supplement (doi:10.1176/appi.ps.202000315), 2021-05-17

*Study Design*

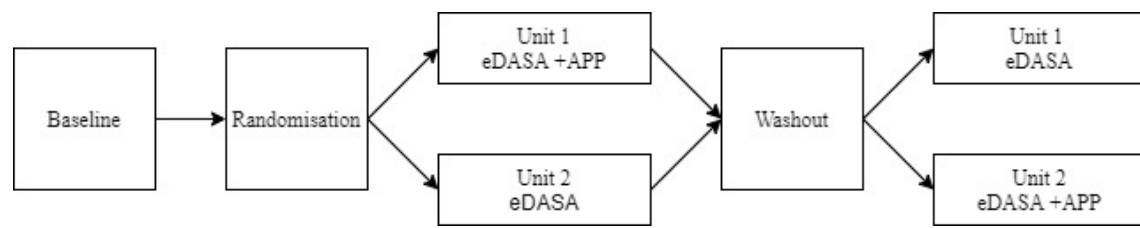

Supplement: appi.ps.202000315.ds001.pdf [file appi.ps.202000315.ds001.pdf]
